# Supplementary material for: Myopia Control with Low-Dose Atropine in European Children: Six-Month Results from a Randomized, Double-Masked, Placebo-Controlled, Multicenter Study
Source: MDPI journal article supplement (doi:10.3390/jpm13020325), 2023-02-14
Supplement: s1 [file s1]

# Myopia Control with Low-Dose Atropine in European Children: Six-Month Results from a Randomized, Double-Masked, Placebo-Controlled, Multicenter Study

Anders Hvid-Hansen <sup>1,\*</sup>, Nina Jacobsen <sup>1,2</sup>, Flemming Møller <sup>3</sup>, Toke Bek <sup>4</sup>, Brice Ozenne <sup>5,6</sup> and Line Kessel <sup>1,2</sup>

<sup>1</sup> Department of Ophthalmology, Copenhagen University Hospital—Rigshospitalet-Glostrup, DK-2600 Glostrup, Denmark

<sup>2</sup> Department of Clinical Medicine, University of Copenhagen, DK-2200 København N, Denmark

<sup>3</sup> Department of Ophthalmology, University Hospital of Southern Denmark—Vejle Hospital, DK-7100 Vejle, Denmark

<sup>4</sup> Department of Ophthalmology, Aarhus University Hospital, DK-8200 Aarhus N, Denmark

<sup>5</sup> Department of Public Health, Section of Biostatistics, University of Copenhagen, DK-1014 København K, Denmark

<sup>6</sup> Neurobiology Research Unit, Copenhagen University Hospital—Rigshospitalet, DK-2200 København N, Denmark

\* Correspondence: anders.johan.hvid-hansen@regionh.dk

**Table S1: Scheduled visits and examinations**

|                           | Scree | Base | 3 mo | 6 mo | 9 mo | 12 mo | 18 mo | 24 mo | 30 mo | 36 mo |
|---------------------------|-------|------|------|------|------|-------|-------|-------|-------|-------|
| Slit lamp exam            | X     |      |      |      |      |       |       |       |       |       |
| Dilated fundus exam       | X     |      |      |      |      |       |       |       |       |       |
| Non-cycloplegic autoref.  | X     | X    | X    | X    | X    | X     | X     | X     | X     | X     |
| Cycloplegic autoref.      | X     | X    | X    | X    | X    | X     | X     | X     | X     | X     |
| Manifest refraction       | X     | X    | X    | X    | X    | X     | X     | X     | X     | X     |
| Distance BCVA             | X     | X    | X    | X    | X    | X     | X     | X     | X     | X     |
| Near BCVA                 |       | X    | X    | X    | X    | X     | X     | X     | X     | X     |
| Accommodation amplitude   |       | X    | X    | X    | X    | X     | X     | X     | X     | X     |
| IOLMaster 700             | X     | (X)  | X    | X    | X    | X     | X     | X     | X     | X     |
| Scheimpflug imaging       | X     | (X)  | X    | X    | X    | X     | X     | X     | X     | X     |
| Pupillometry              | X     | (X)  | X    | X    | X    | X     | X     | X     | X     | X     |
| SS-OCT                    |       | X    | X    | X    | X    | X     | X     | X     | X     | X     |
| Intraocular pressure      | X     | (X)  | X    | X    | X    | X     | X     | X     | X     | X     |
| Trial medication          |       | X    | X    | X    | X    | X     | X     | X     |       |       |
| Compliance                |       |      |      |      |      |       |       |       |       |       |
| Registration of AR and AE |       | X    | X    | X    | X    | X     | X     | X     | X     | X     |

**Footnotes:** (X), optional examination if the period between screening and baseline was less than four weeks.

**Abbreviations:** AE = adverse events; AR = adverse reaction; autoref. = autorefraction; Base = Baseline; BCVA = best-corrected visual acuity; mo = months; Scree = screening; SS-OCT = swept-source optical coherence tomography.

**Table S2: Parental self-reported weekly compliance**

| Compliance, N (%)       | Treatment groups |                              |                                          |
|-------------------------|------------------|------------------------------|------------------------------------------|
|                         | Placebo          | Low-dose<br>(0.01% atropine) | Loading dose<br>(0.1% to 0.01% atropine) |
| <b>At 3-month visit</b> |                  |                              |                                          |
| N                       | 32               | 32                           | 33                                       |
| 6 days                  | 1 (3.1)          | 1 (3.1)                      | 3 (9.1)                                  |
| 7 days                  | 31 (96.9)        | 31 (96.9)                    | 30 (90.9)                                |
| <b>At 6-month visit</b> |                  |                              |                                          |
| N                       | 31               | 32                           | 33                                       |
| 6 days                  | 1 (3.2)          | 1 (3.1)                      | 3 (9.1)                                  |
| 7 days                  | 30 (96.8)        | 31 (96.9)                    | 30 (90.9)                                |

**Notes:** Weekly compliance as reported by the parents and presented as the number of days the trial medication was administered as prescribed during an average week since the last follow-up. No parents reported compliance below six days a week.

**Footnotes:** \*, adj-P < 0.05; \*\*, adj-P < 0.01; \*\*\*, adj-P < 0.001.

**Abbreviations:** N = number of participants.
